# Supplementary material
Source: Springer Nature journal article supplement (https://www.springermedizin.de/resource/supplementary/12985_2009_789_MOESM6_ESM.pdf/9609196)

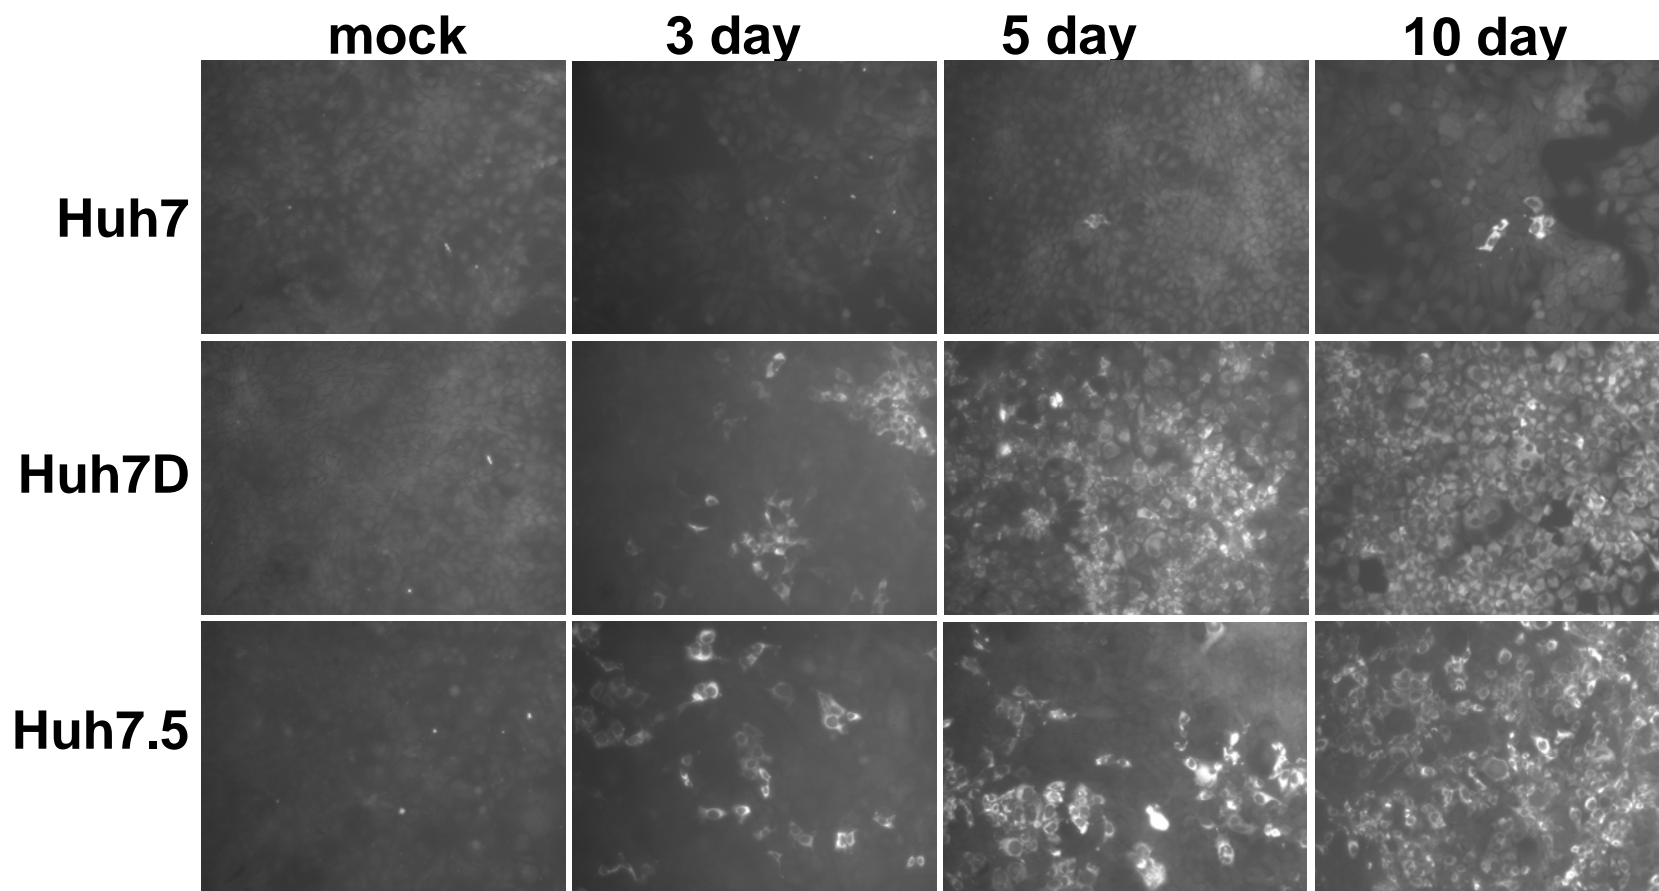

Figure 4, Feigelstock et al

Supplement: MOESM6 [file 9609196]
